# Supplementary material for: Simulating soil atmosphere exchanges and CO 2 fluxes for a restored peatland
Source: Copernicus journal article supplement (doi:10.5194/egusphere-2024-2679), 2024-09-06
Supplement: Supplementary file 1 [file egusphere-2024-2679-supplement.pdf]

1 **Supplementary to Simulating soil atmosphere exchanges and CO<sub>2</sub> fluxes for a restored peatland**

2 Hongxing He<sup>1</sup>; Ian B. Strachan<sup>2</sup>; and Nigel T Roulet<sup>1</sup>

3 [hongxing.he@mcgill.ca](mailto:hongxing.he@mcgill.ca); [ian.strachan@queensu.ca](mailto:ian.strachan@queensu.ca); [nigel.roulet@mcgill.ca](mailto:nigel.roulet@mcgill.ca)

4 Hongxing He, <https://orcid.org/0000-0003-4953-7450>

5 Ian Strachan, <https://orcid.org/0000-0001-6457-5530>

6 Nigel T Roulet, <https://orcid.org/0000-0001-9571-1929>

8 <sup>1</sup> Department of Geography, McGill University, Montréal, Quebec, Canada

9 <sup>2</sup> Department of Geography and Planning, Queen’s University, Kingston, Ontario, Canada

10 Correspondence, HH [hongxing.he@mcgill.ca](mailto:hongxing.he@mcgill.ca); [hongxing-he@hotmail.com](mailto:hongxing-he@hotmail.com)

11

12 **Supplementary section A. Parameters values used in the reference model run**

13 **Table S1** List of model parameters used in the model run that differs from the model default for  
 14 the BDB restored peatland, for details of the parameter, equations see Jansson and Karlberg (2011)

| Symbol          | Parameters                                                                                                                | Value       | Unite                | References             |
|-----------------|---------------------------------------------------------------------------------------------------------------------------|-------------|----------------------|------------------------|
| $p_{cmax}$      | Surface max cover, shrub-trees/sedges/moss                                                                                | 0.5/0.5/1   | -                    | Nugent et al. (2018)   |
| $k_m$           | Beer’s extinction coefficient, shrub-trees/sedges/moss                                                                    | 0.5/0.5/1   | -                    | Frolking et al. (2002) |
| $p_{ck}$        | The sensitivity of reach max cover on LAI, shrub-trees/sedges/moss                                                        | 1/2/4       | -                    | Moore et al. (2002)    |
| $z_r$           | The lowest shrub rooting depth, shrub-trees/sedges/moss                                                                   | 0.5/0.35/0  | m                    | Assumed                |
| $\varepsilon$   | Light use efficiency, shrub-trees/sedges/moss                                                                             | 1.15/1/0.65 | g C MJ <sup>-1</sup> | Kross et al. (2016)    |
| $\theta_{Amin}$ | The minimum amount of air that is necessary to prevent a reduction of root water uptake, shrub-trees/sedges/moss          | 5/2/0       | vol %                | Silvola et al. (1996)  |
| $\psi_c$        | Critical pressure head for reduction of potential water uptake, shrub-trees/sedges/moss                                   | 100/60/40   | cm water             |                        |
| $p_l$           | Coefficient determines how fast the reduction of potential water uptake when $\psi_c$ is reached, shrub-trees/sedges/moss | 1/0.5/4     | day <sup>-1</sup>    |                        |
| $p_{mn}$        | Threshold Air temperature when photosynthesis starts, shrub-trees/sedges/moss                                             | 5/5/0       | °C                   | Moore et al. (2006)    |

|                  |                                                                                                                                                                              |                      |                                    |                                                                              |
|------------------|------------------------------------------------------------------------------------------------------------------------------------------------------------------------------|----------------------|------------------------------------|------------------------------------------------------------------------------|
| $p_{rl,sp}$      | Specific leaf area, shrub-trees/sedges/moss                                                                                                                                  | 75/45/45             | $\text{g C m}^{-2}$                | Assumed                                                                      |
| $r_{alai}$       | LAI Scale factor for $r_a$ of the shrub layer                                                                                                                                | 100                  | $\text{m s}^{-1}$                  |                                                                              |
| $l_{cl}$         | Leaf allocation parameter, shrub-trees/sedges/moss                                                                                                                           | 0.25/0.35/0.9        | -                                  | He et al. (2023)                                                             |
| $r_{wcl}$        | Root allocation parameter, shrub-trees/sedges/moss                                                                                                                           | 0.3/0.35/0.00        | -                                  |                                                                              |
| $l_{Lc}$         | Leaf litterfall rate, shrub-trees/sedges/moss                                                                                                                                | 0.004/0.004/0.02     | $\text{d}^{-1}$                    | Calculated based on literature pool turnover rates                           |
| $l_{Rc}$         | Root litterfall rate, shrub-trees/sedges/moss                                                                                                                                | 0.00175              | $\text{d}^{-1}$                    |                                                                              |
| $l_{CRc}$        | Coarse root litterfall rate, shrub-trees/sedges/moss                                                                                                                         | 0.0001               | $\text{d}^{-1}$                    |                                                                              |
| $l_{Sc}$         | Stem litterfall rate, shrub-trees/sedges/moss                                                                                                                                | 0.0005/0.0005/0.0001 | $\text{d}^{-1}$                    |                                                                              |
| $z_o$            | The surface roughness length                                                                                                                                                 | 0.001                | m                                  | Campbell et al. (2002)                                                       |
| $\varepsilon_s$  | The emissivity of the ground                                                                                                                                                 | 0.95                 | -                                  | Kettridge and Baird (2008)                                                   |
| $\alpha_{dry}$   | Soil albedo when tension $>10^4$ cm H <sub>2</sub> O                                                                                                                         | 15                   | %                                  | Kellner (2001)                                                               |
| $\alpha_{wet}$   | Soil albedo when tension $<10$ cm H <sub>2</sub> O                                                                                                                           | 5                    | %                                  |                                                                              |
| $kB^{-1}$        | Difference between the natural logarithm of surface roughness length for momentum and heat                                                                                   | 2.3                  | -                                  | Humphreys et al. (2006)                                                      |
| $\psi_g$         | The empirical correction factor compensates for the difference between the mean soil moisture potential in the top-soil layer and the soil moisture potential at the surface | 2.1                  | -                                  | Assumed                                                                      |
| $M_T$            | The snow melting coefficients for air temperature                                                                                                                            | 2                    | $\text{kg C m}^{-2} \text{d}^{-1}$ | Gustafsson et al. (2001)                                                     |
| $M_R$            | The snow melting coefficients for radiation                                                                                                                                  | $2 \times 10^{-7}$   | $\text{kg J}^{-1}$                 |                                                                              |
| $\theta_{sat}$   | Total porosity *                                                                                                                                                             | 98.8 - 90            | vol %                              | Measured                                                                     |
| $n_{tortuosity}$ | Tortuosity                                                                                                                                                                   | 1                    | -                                  | Default                                                                      |
| $\theta_m$       | Macroporosity *                                                                                                                                                              | 30-10                | vol %                              | Liu and Lennartz (2019)                                                      |
| $k_{minus}$      | The minimum hydraulic conductivity                                                                                                                                           | $1 \times 10^{-5}$   | $\text{mm d}^{-1}$                 | Alvenäs and Jansson (1997)                                                   |
| $k_{sat}$        | Total saturated hydraulic conductivity*                                                                                                                                      | 100000 - 600         | $\text{mm d}^{-1}$                 | McCarter and Price (2015) and Gauthier et al. (2022)                         |
| $\theta_r$       | Residual water content*                                                                                                                                                      | 10-30                | vol %                              | Schwärzel et al. (2002); Menberu et al. (2021) and McCarter and Price (2013) |
| $\theta_{wilt}$  | Wilting point *                                                                                                                                                              | 10-30                | vol %                              |                                                                              |
| $a_{scale}$      | The sorption scaling coefficient to calculate macropore flow                                                                                                                 | 0.05                 | -                                  | Assumed                                                                      |
| $a_{surf}$       | The first-order coefficient for surface runoff                                                                                                                               | 0.05                 | -                                  | Assumed                                                                      |
| $d_{space}$      | The distance between drainage ditches                                                                                                                                        | 500                  | m                                  | Measured                                                                     |
| $z_{ditch}$      | Drainage ditch depth                                                                                                                                                         | 0.7                  | m                                  |                                                                              |
| $p_{max}$        | The maximum surface water pool cover                                                                                                                                         | 0.3                  | -                                  | Assumed                                                                      |
| $f_{wcvotot}$    | The maximum amount of water on the soil surface pool                                                                                                                         | 50                   | mm                                 | Mustamo et al. (2016)                                                        |
| $k_l$            | First-order decomposition coefficient for labile C                                                                                                                           | 0.25                 | $\text{yr}^{-1}$                   | Frolking et al. (2010)                                                       |
| $k_{ref}$        | First-order decomposition coefficient for refractory C                                                                                                                       | 0.004                | $\text{yr}^{-1}$                   |                                                                              |

|                     |                                                                |           |                                 |                                                           |
|---------------------|----------------------------------------------------------------|-----------|---------------------------------|-----------------------------------------------------------|
| $C_{tot}$           | Total soil C at 1.5 m profile                                  | 101800    | $\text{g C m}^{-2}$             | Calculated from measured bulk density and C concentration |
| $C_{tot, layer}$    | Total soil C for each simulated layer*                         | 625-56000 | $\text{g C m}^{-2}$             |                                                           |
| $Q_{10}$            | $Q_{10}$ value for decomposition                               | 3         | -                               | Lafleur et al. (2005)                                     |
| $p_{\theta Low}$    | Lower range for moisture response                              | 50        | vol %                           | Or et al. (2007)                                          |
| $p_{\theta Upp}$    | Upper range for moisture response                              | 30        | vol %                           |                                                           |
| $p_{\theta p}$      | Shape coefficient for the response function                    | 1         | -                               |                                                           |
| $p_{\theta satact}$ | Anaerobic activity                                             | 0.1       | -                               | Scanlon and Moore (2000)                                  |
| $h_1$               | Thermal conductivity coefficient for peat soil                 | 0.01      | $\text{W m}^{-1} \text{C}^{-1}$ | Lai, (2022)                                               |
| $h_2$               | Thermal conductivity coefficient for peat soil                 | 0.0075    | $\text{W m}^{-1} \text{C}^{-1}$ |                                                           |
| $c_f$               | The coefficient for frozen surface conduction damping function | 0.2       | $\text{C}^{-1}$                 | Assumed                                                   |

15 \* Note different values were used for the simulated 9 soil layers, the range from top to bottom layer was given.  
16

17 **Supplementary section B. Time series of surface energy fluxes and soil temperature profiles,**  
18 **used for model evaluation and validation, and additional simulation results for future**  
19 **climate change impact**

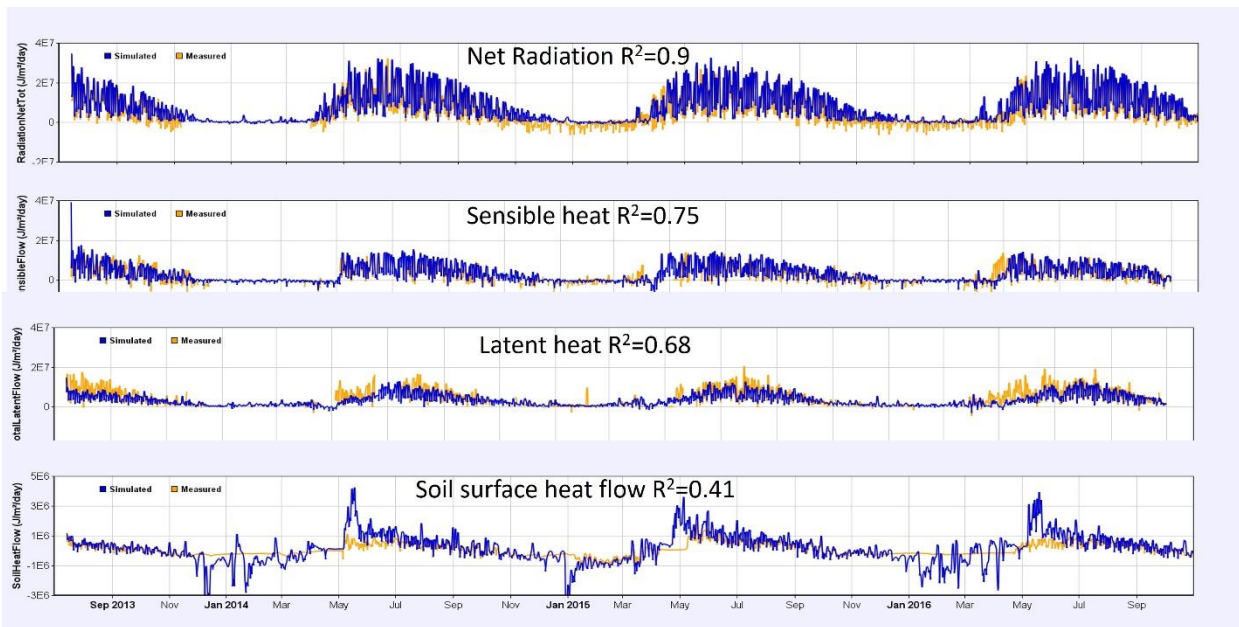

20  
21 Fig. S1 Measured (orange) and simulated (blue) daily total net radiation, sensible heat, latent  
22 heat and soil surface heat flux.

23

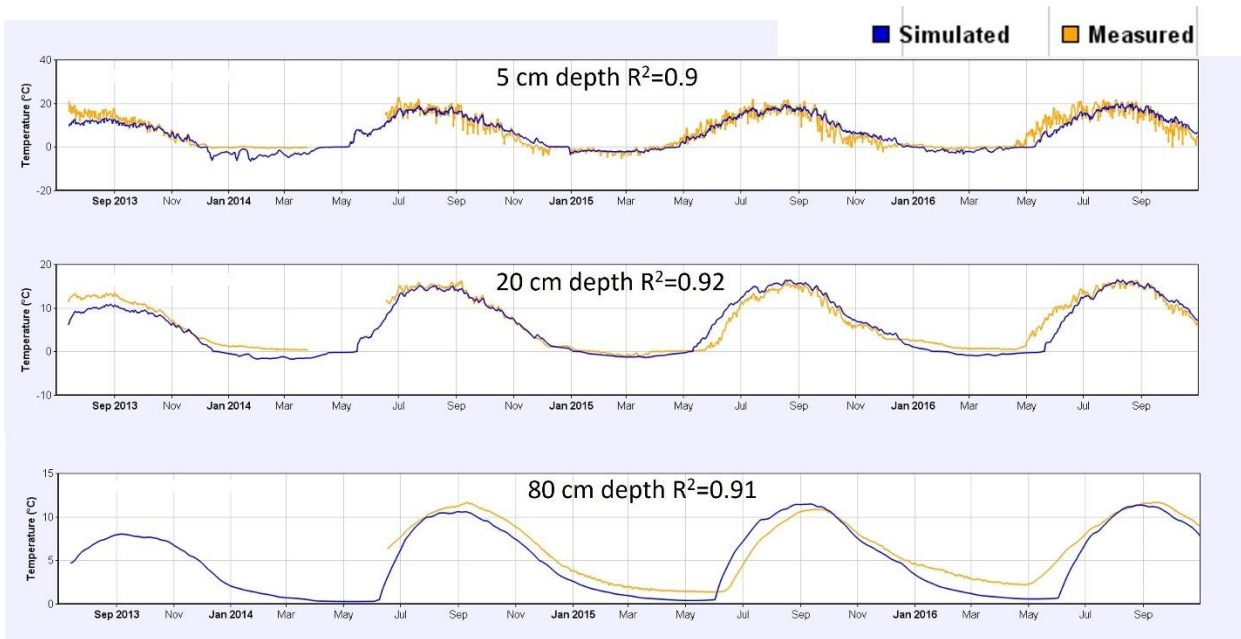

24

25 Fig. S2. Measured (orange) and simulated (blue) 30-minute soil temperature profiles

26

27

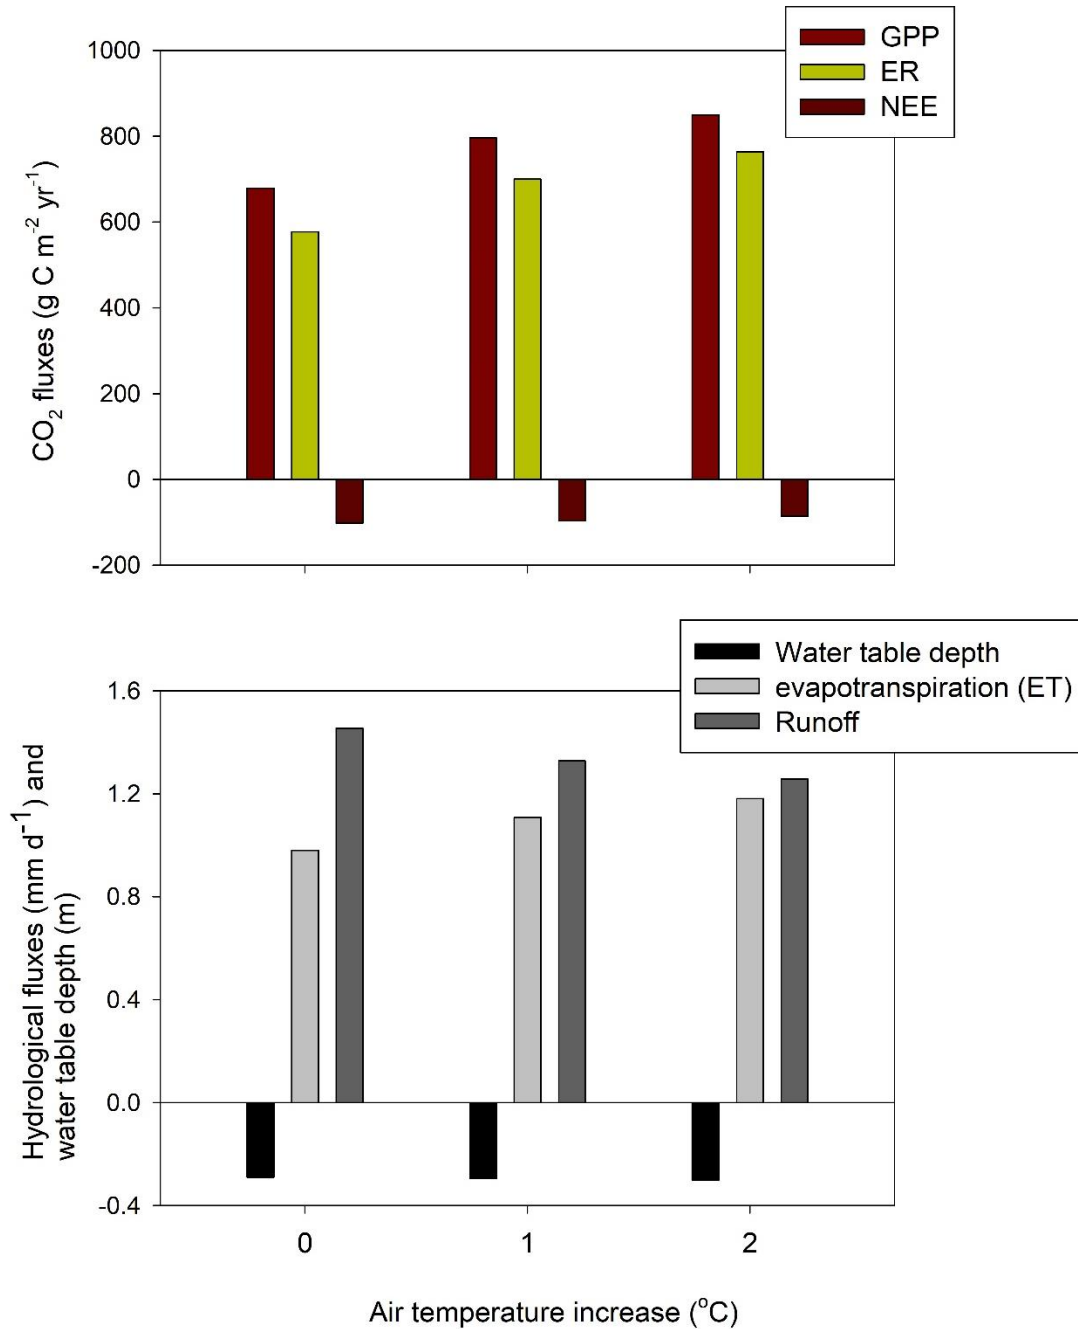

28

29 Fig S3. Simulated mean annual CO<sub>2</sub> fluxes and hydrological fluxes (evapotranspiration and  
 30 runoff) and water table depth under future year around temperature increase; scenario 0 is the  
 31 reference run. Equilibrium model runs use BDB 2013-2016 setup and Rivière-du-Loup 1994-  
 32 2021 climate data.

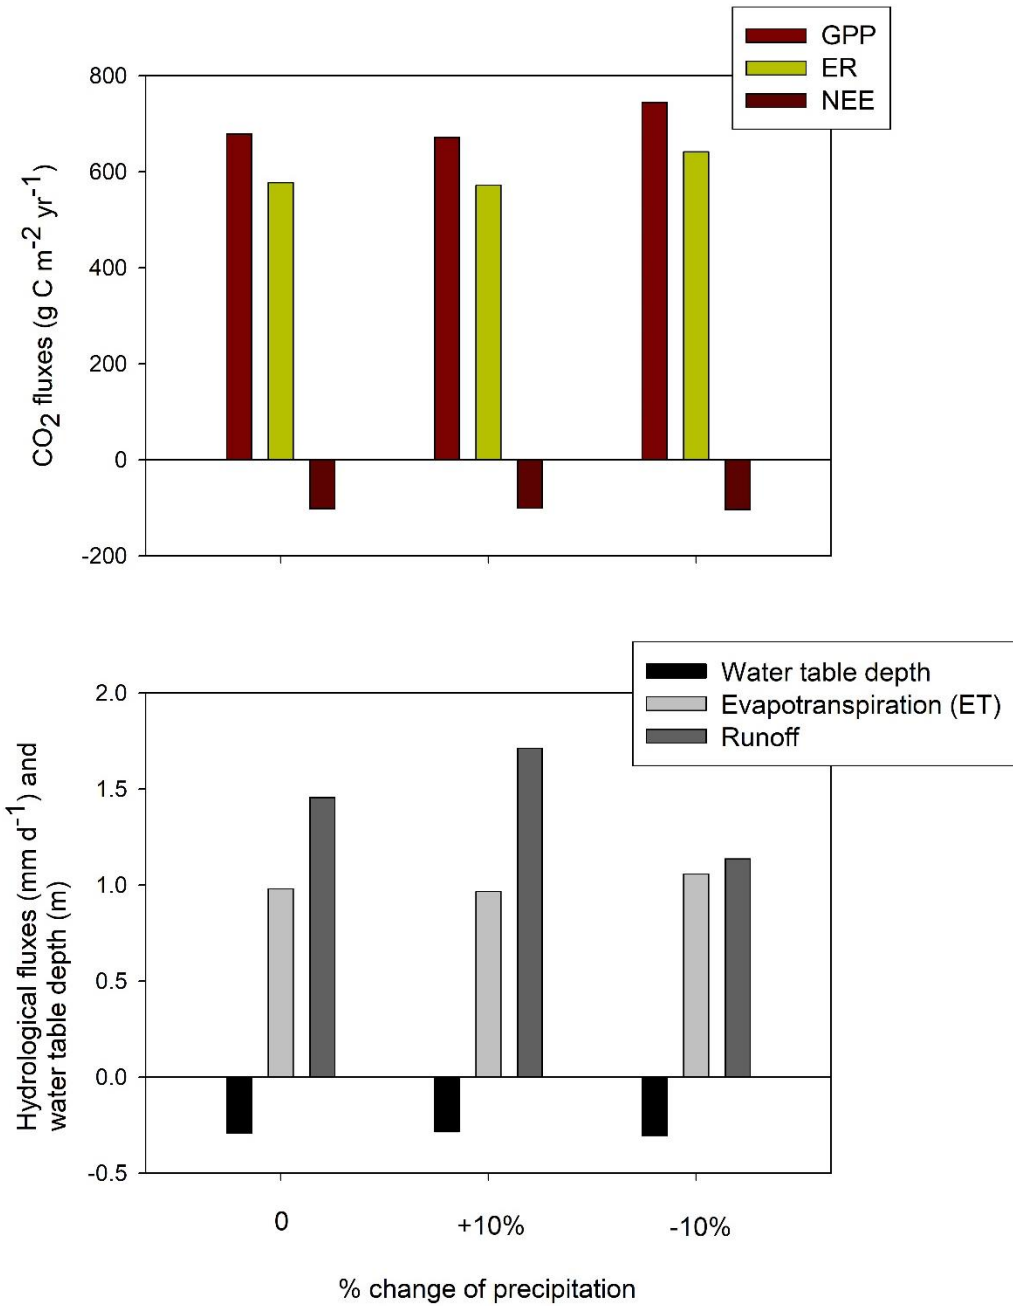

33

34 Fig S4. Simulated mean annual CO<sub>2</sub> fluxes and hydrological fluxes (evapotranspiration and  
 35 runoff) and water table depth under future year around precipitation increase or decrease by  
 36 10%; scenario 0 is the reference run. Equilibrium model runs use BDB 2013-2016 setup and  
 37 Rivière-du-Loup 1994-2021 climate data.

38

39 **References**

- 40 Alvenäs, G., Jansson, P.E., 1997. Model for evaporation, moisture and temperature of bare soil:  
41 calibration and sensitivity analysis. *Agricultural and Forest Meteorology* 88, 47-56.
- 42 Campbell, D.R., Lavoie, C., Rochefort, L., 2002. Wind erosion and surface stability in abandoned milled  
43 peatlands. *Canadian Journal of Soil Science* 82, 85-95.
- 44 Frolking, S., Roulet, N.T., Moore, T.R., Lafleur, P.M., Bubier, J.L., Crill, P.M., 2002. Modeling seasonal to  
45 annual carbon balance of Mer Bleue Bog, Ontario, Canada. *Global Biogeochemical Cycles* 16, 4-1-4-21.
- 46 Frolking, S., Roulet, N.T., Tuittila, E., Bubier, J.L., Quillet, A., Talbot, J., Richard, P.J.H., 2010. A new model  
47 of Holocene peatland net primary production, decomposition, water balance, and peat accumulation.  
48 *Earth System Dynamics Discussions* 1, 115-167.
- 49 Gauthier, T.-L.J., Elliott, J.B., McCarter, C.P.R., Price, J.S., 2022. Field-scale compression of Sphagnum  
50 moss to improve water retention in a restored bog. *Journal of Hydrology* 612.
- 51 Gustafsson, D., Stähli, M., Jansson, P.-E., 2001. The surface energy balance of a snow cover: comparing  
52 measurements to two different simulation models. *Theoretical and Applied Climatology* 70, 81-96.
- 53 He, H., Moore, T., Humphreys, E.R., Lafleur, P.M., Roulet, N.T., 2023. Water level variation at a beaver  
54 pond significantly impacts net CO<sub>2</sub> uptake of a continental bog. *Hydrology and Earth System Sciences* 27,  
55 213-227.
- 56 Humphreys, E.R., Lafleur, P.M., Flanagan, L.B., Hedstrom, N., Syed, K.H., Glenn, A.J., Granger, R., 2006.  
57 Summer carbon dioxide and water vapor fluxes across a range of northern peatlands. *Journal of*  
58 *Geophysical Research: Biogeosciences* 111.
- 59 Jansson, P.-E., Karlberg, L., 2011. User manual of Coupled heat and mass transfer model for soil-plant-  
60 atmosphere systems. Royal institute of technology, Department of land and water resources,  
61 Stockholm.
- 62 Kellner, E., 2001. Surface energy fluxes and control of evapotranspiration from a Swedish sphagnum  
63 mire. *Agricultural and Forest Meteorology* 110, 101-123.
- 64 Kettridge, N., Baird, A., 2008. Modelling soil temperatures in northern peatlands. *European Journal of*  
65 *Soil Science* 59, 327-338.
- 66 Kross, A., Seaquist, J.W., Roulet, N.T., 2016. Light use efficiency of peatlands: Variability and suitability  
67 for modeling ecosystem production. *Remote Sensing of Environment* 183, 239-249.
- 68 Lafleur, P.M., Moore, T.R., Roulet, N.T., Frolking, S., 2005. Ecosystem Respiration in a Cool Temperate  
69 Bog Depends on Peat Temperature But Not Water Table. *Ecosystems* 8, 619-629.
- 70 Liu, H., Lennartz, B., 2019. Hydraulic properties of peat soils along a bulk density gradient-A meta study.  
71 *Hydrological processes* 33, 101-114.
- 72 McCarter, C.P.R., Price, J.S., 2013. The hydrology of the Bois-des-Bel bog peatland restoration: 10 years  
73 post-restoration. *Ecological Engineering* 55, 73-81.
- 74 McCarter, C.P.R., Price, J.S., 2015. The hydrology of the Bois-des-Bel peatland restoration: hydrophysical  
75 properties limiting connectivity between regenerated Sphagnum and remnant vacuum harvested peat  
76 deposit. *Ecohydrology* 8, 173-187.
- 77 Menberu, M.W., Marttila, H., Ronkanen, A.K., Haghghi, A.T., Kløve, B., 2021. Hydraulic and Physical  
78 Properties of Managed and Intact Peatlands: Application of the Van Genuchten-Mualem Models to Peat  
79 Soils. *Water Resources Research* 57.
- 80 Moore, T., Bubier, J., Frolking, S., Lafleur, P.M., Roulet, N.T., 2002. Plant biomass and production and  
81 CO<sub>2</sub> exchange in an ombrotrophic bog. *Journal of Ecology* 90, 25-36.
- 82 Moore, T.R., Lafleur, P.M., Poon, D.M.I., Heumann, B.W., Seaquist, J.W., Roulet, N.T., 2006. Spring  
83 photosynthesis in a cool temperate bog. *Global Change Biology* 12, 2323-2335.

84 Mustamo, P., Hyvärinen, M., Ronkanen, A.K., Kløve, B., Moffat, A.J., 2016. Physical properties of peat  
85 soils under different land use options. *Soil Use and Management* 32, 400-410.

86 Nugent, K.A., Strachan, I.B., Strack, M., Roulet, N.T., Rochefort, L., 2018. Multi-year net ecosystem  
87 carbon balance of a restored peatland reveals a return to carbon sink. *Glob Chang Biol* 24, 5751-5768.

88 Or, D., Smets, B.F., Wraith, J.M., Dechesne, A., Friedman, S.P., 2007. Physical constraints affecting  
89 bacterial habitats and activity in unsaturated porous media – a review. *Advances in Water Resources* 30,  
90 1505-1527.

91 Scanlon, D., Moore, T., 2000. Carbon dioxide production from peatland soil profiles: the influence of  
92 temperature, oxic/anoxic conditions and substrate. *Soil Science* 165, 153-160.

93 Schwärzel, K., Renger, M., Sauerbrey, R., Wessolek, G., 2002. Soil physical characteristics of peat soils.  
94 *Journal of Plant Nutrition and Soil Science* 165, 479-486.

95 Silvola, J., Alm, J., Ahlholm, U., Hykänen, H., Martikainen, P.J., 1996. CO<sub>2</sub> fluxes from peat in boreal mires  
96 under varying temperature and moisture conditions. *Journal of Ecology* 84, 219-228.

97
